# Supplementary material for: Effects of Allogeneic Mesenchymal Stem Cell Transplantation in Dogs with Inflammatory Bowel Disease Treated with and without Corticosteroids
Source: Animals (Basel). 2021 Jul 10;11(7):2061. doi: 10.3390/ani11072061 (PMC8300310; doi:10.3390/ani11072061)
Supplement: Supplementary file 1 [file animals-11-02061-s001.zip › animals-1254244-supplementary.pdf]

## Article

# Effects of Allogeneic Mesenchymal Stem Cell Transplantation in Dogs with Inflammatory Bowel Disease Treated with and without Corticosteroids.

José Ignacio Cristóbal <sup>1,\*</sup>, Francisco Javier Duque <sup>1</sup>, Jesús Usón <sup>1</sup>, Esther López <sup>2</sup>, Patricia Ruiz <sup>1</sup> and Eva María Pérez <sup>1</sup>

**Table S1.** Significance level (p-value) between the values of each studied parameter (CIBDAI, CCECAI, albumin and cobalamin concentration) obtained at each review (T0, T1, T3, T6, and T12) in the MSC and P-MSC groups.

|               | CIBDAI      |             | CCECAI      |             | ALBUMIN     |             | COBALAMIN   |             |
|---------------|-------------|-------------|-------------|-------------|-------------|-------------|-------------|-------------|
|               | MSC         | P-MSC       | MSC         | P-MSC       | MSC         | P-MSC       | MSC         | P-MSC       |
| <b>T0-T1</b>  | $p < 0.001$ | $p < 0.001$ | $p < 0.001$ | $p < 0.001$ | $p = 0.892$ | $p = 0.880$ | $p = 0.949$ | $p = 0.998$ |
| <b>T0-T3</b>  | $p < 0.001$ | $p < 0.001$ | $p < 0.001$ | $p < 0.001$ | $p = 0.316$ | $p = 0.179$ | $p = 0.432$ | $p = 0.891$ |
| <b>T0-T6</b>  | $p < 0.001$ | $p < 0.001$ | $p < 0.001$ | $p < 0.001$ | $p = 0.183$ | $p = 0.048$ | $p = 0.019$ | $p = 0.975$ |
| <b>T0-T12</b> | $p < 0.001$ | $p < 0.001$ | $p < 0.001$ | $p < 0.001$ | $p = 0.190$ | $p = 0.045$ | $p < 0.001$ | $p = 0.933$ |
| <b>T1-T3</b>  | $p = 0.995$ | $p = 0.520$ | $p = 0.944$ | $p = 0.523$ | $p = 0.858$ | $p = 0.651$ | $p = 0.883$ | $p = 0.968$ |
| <b>T1-T6</b>  | $p = 0.998$ | $p = 0.290$ | $p = 0.999$ | $p = 0.216$ | $p = 0.672$ | $p = 0.284$ | $p = 0.173$ | $p = 0.996$ |
| <b>T1-T12</b> | $p = 0.794$ | $p = 0.162$ | $p = 0.739$ | $p = 0.131$ | $p = 0.588$ | $p = 0.216$ | $p < 0.001$ | $p = 0.982$ |
| <b>T3-T6</b>  | $p = 1.000$ | $p = 0.986$ | $p = 0.993$ | $p = 0.962$ | $p = 0.996$ | $p = 0.968$ | $p = 0.710$ | $p = 1.000$ |
| <b>T3-T12</b> | $p = 0.940$ | $p = 0.896$ | $p = 0.993$ | $p = 0.854$ | $p = 0.966$ | $p = 0.864$ | $p = 0.008$ | $p = 1.000$ |
| <b>T6-T12</b> | $p = 0.961$ | $p = 0.995$ | $p = 0.920$ | $p = 0.997$ | $p = 0.998$ | $p = 0.994$ | $p = 0.186$ | $p = 1.000$ |
